# Supplementary material for: Detrimental effects of excessive fatty acid secretion on female sperm storage in chickens
Source: J Anim Sci Biotechnol. 2020 Apr 2;11:26. doi: 10.1186/s40104-020-0432-8 (PMC7114795; doi:10.1186/s40104-020-0432-8)
Supplement: Supplementary file 2 — Additional file 2: Table S1. Descriptive statistics of duration of fertility and hatching egg production (HEP) in the two test periods. [file 40104_2020_432_MOESM2_ESM.xlsx]

## Sheet: S1
Table S1. Descriptive statistics of duration of fertility and hatching egg production (HEP) in the two test periods.
Period i	Traits ii	N iii	Mean	SD	CV (%) iv
Period 1	FDD1	2173	10.3	2.34	22.71
	FE1	2173	0.9025	0.1158	12.83
	HEP1	2202	10.05	1.79	17.84
Period 2	FDD2	1895	9.2	4.04	43.96
	FE2	1895	0.7047	0.1852	26.28
	HEP2	2082	9.28	3.13	33.75
i: Period 1 represents the first experimental period from 245 to 256 days of age (12 days) and period 2 represents the second experimental period from 378-392 days of age (15 days).
ii: FDD=Fertility duration day; FE=Fertility.
iii: Number of non-missing values for each trait.
iv: Coefficient of variation.
