# Supplementary material for: Detrimental effects of excessive fatty acid secretion on female sperm storage in chickens
Source: J Anim Sci Biotechnol. 2020 Apr 2;11:26. doi: 10.1186/s40104-020-0432-8 (PMC7114795; doi:10.1186/s40104-020-0432-8)
Supplement: Supplementary file 4 — Additional file 4: Table S2. Physiological parameters and duration of fertility of hens that used for metabolomics study. [file 40104_2020_432_MOESM4_ESM.xlsx]

## Sheet: S2
Table S2. Physiological parameters and duration of fertility of hens that used for metabolomics study.
Traitsa	HFSS (n=8)	LFSS (n=8)	P valueb
Body weight, kg	2.63 ± 0.30	2.62 ± 2.20	0.93
The density of SSTs, %	4.01 ± 0.58	4.28 ± 0.83	0.47
FDD1, d	11.75 ± 0.46	3.63 ± 2.45	2.34×10-5
FE1, %	98.96 ± 2.95	56.97 ± 13.62	3.60×10-5
FDD2, d	14.5 ± 0.76	1.75 ± 2.19	1.26×10-7
FE2, %	100	33.57 ± 13.87	2.81×10-6
All responses are compared between two groups and listed as mean and standard division including P-values.
a: FE1 and FE2 represent individual fertility during the first and second experimental period, repectively; FDD1 and FDD2 represent feritility duration day during the first and second experimental period, repectively.
b: The P-value was obtained by one-way ANOVA.
