# Supplementary material for: Detrimental effects of excessive fatty acid secretion on female sperm storage in chickens
Source: J Anim Sci Biotechnol. 2020 Apr 2;11:26. doi: 10.1186/s40104-020-0432-8 (PMC7114795; doi:10.1186/s40104-020-0432-8)
Supplement: Supplementary file 6 — Additional file 6: Table S4. Pathway analysis of differentially expressed metabolites. [file 40104_2020_432_MOESM6_ESM.xlsx]

## Sheet: S4
Table S4. Pathway analysis of differentially expressed metabolites.
Pathway	Classification a	Total	Expected	Hits	Raw P	-ln(P)	Holm adjust	FDR	Impact	Related metabolites
Biosynthesis of unsaturated fatty acids	Lipid metabolism	22	0.37145	4	0.0003661	7.9126	0.028556	0.028556	0	Hexadecanoic acid; Arachidonic acid; Linoleic acid; Oleic acid
Cysteine and methionine metabolism	Amino acid metabolism	27	0.45587	3	0.0094033	4.6667	0.72406	0.36673	0.18308	Cystine; Cystathionine; 5-S-Methyl-5-Thioadenosine
Ubiquinone and other terpenoid-quinone biosynthesis	Metabolism of cofactors and vitamins	3	0.050652	1	0.04984	2.9989	1	1	0	Tyrosine
Phenylalanine, tyrosine and tryptophan biosynthesis	Amino acid metabolism	4	0.067536	1	0.065919	2.7193	1	1	0.5	Tyrosine
Linoleic acid metabolism	Lipid metabolism	4	0.067536	1	0.065919	2.7193	1	1	1	Linoleic acid
Pyrimidine metabolism	Nucleotide metabolism	37	0.62471	2	0.12708	2.063	1	1	0.07288	Linoleic acid
Phenylalanine metabolism	Amino acid metabolism	8	0.13507	1	0.12768	2.0582	1	1	0	Uridine;Uracil
Caffeine metabolism	Biosynthesis of other secondary metabolites	9	0.15196	1	0.1425	1.9484	1	1	0	Theobromine
Fatty acid biosynthesis	Lipid metabolism	43	0.72602	2	0.16228	1.8184	1	1	0	Oleic acid; Hexadecanoic acid
Aminoacyl-tRNA biosynthesis	Genetic Information Processing	44	0.7429	2	0.16833	1.7818	1	1	0	Tyrosine; Proline
Pantothenate and CoA biosynthesis	Metabolism of cofactors and vitamins	17	0.28703	1	0.2527	1.3756	1	1	0	Uracil
beta-Alanine metabolism	Metabolism of other amino acids	20	0.33768	1	0.29043	1.2364	1	1	0	Uracil
Pyruvate metabolism	Carbohydrate metabolism	23	0.38833	1	0.32634	1.1198	1	1	0	Lactic acid
Glycolysis or Gluconeogenesis	Carbohydrate metabolism	26	0.43899	1	0.3605	1.0203	1	1	0	Lactic acid
Steroid biosynthesis	Lipid metabolism	28	0.47276	1	0.38236	0.9614	1	1	0.21739	Cholesterol
Arachidonic acid metabolism	Lipid metabolism	31	0.52341	1	0.41381	0.88236	1	1	0.35277	Arachidonic acid
Glycine, serine and threonine metabolism	Amino acid metabolism	33	0.55718	1	0.43392	0.83491	1	1	0	Cystathionine
Glycerophospholipid metabolism	Lipid metabolism	33	0.55718	1	0.43392	0.83491	1	1	0	Acetylcholine Chloride
Fatty acid elongation	Lipid metabolism	34	0.57406	1	0.44372	0.81256	1	1	0	Hexadecanoic acid
Fatty acid metabolism	Lipid metabolism	37	0.62471	1	0.47218	0.7504	1	1	0	Hexadecanoic acid
Arginine and proline metabolism	Amino acid metabolism	38	0.6416	1	0.48135	0.73116	1	1	0.07211	Proline
Primary bile acid biosynthesis	Lipid metabolism	40	0.67536	1	0.49924	0.69467	1	1	0.2071	Cholesterol
Tyrosine metabolism	Amino acid metabolism	41	0.69225	1	0.50796	0.67735	1	1	0.13445	Tyrosine
Purine metabolism	Nucleotide metabolism	63	1.0637	1	0.66692	0.40508	1	1	0.09109	Adenosine-5-Monophosphate
Steroid hormone biosynthesis	Lipid metabolism	67	1.1312	1	0.68997	0.37111	1	1	0.02405	Cholesterol
a: The classifications were based on KEGG database.
